# Supplementary material for: A proposed nomenclature for biological processes that remove nitrogen
Source: Royal Society of Chemistry journal article supplement (doi:10.1039/c6ew00216a), 2016-11-24
Supplement: c6ew00216a1.pdf [file c6ew00216a1.pdf]

## 1 Supplemental Information

2

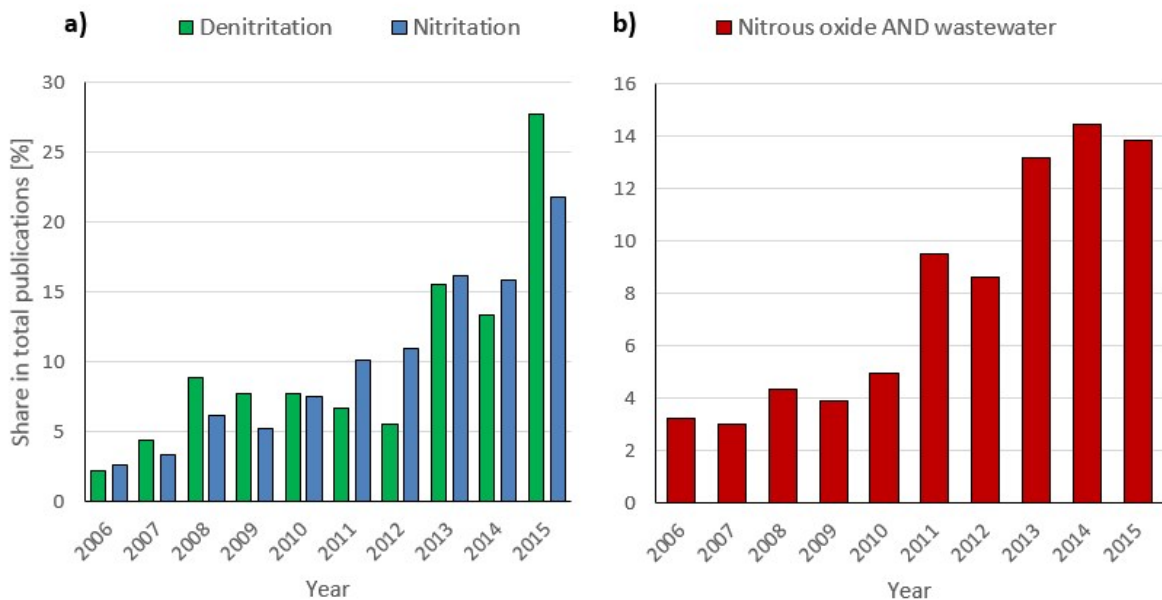

3

4 Figure 1: Illustration of the publication trends in the core collection of Web of Science™ of  
5 a) nitritation, denitrification and b) publications including both terms nitrous oxide and  
6 wastewater in the topic.

7 To illustrate the present relevance of short-cut biological nitrogen removal processes  
8 the shares of total publications in the core collection of Web of Science™ per year  
9 from 2006 to 2015 are presented. As examples for short-cut BNR, the search was  
10 executed for the expressions (a) “*nitritation*” and “*denitrification*” and (b) “*nitrous oxide*  
11 *AND wastewater*”. The increasing trends in a) and b) illustrate the historical  
12 development and underline the development of such processes towards central  
13 techniques in biological wastewater treatment. However, no consistent  
14 nomenclature exists for their description so far.
